# Supplementary material for: Japanese Magazine Articles on Lifestyle Factors Associated with Fertility: A Content Analysis
Source: MDPI journal article supplement (doi:10.3390/women3030031), 2023-08-24
Supplement: s1 [file s1]

**Table S1.** Lifestyle factors associated with reduced fertility.

| Factor                         | References                                      | Sex  |        |         |
|--------------------------------|-------------------------------------------------|------|--------|---------|
|                                |                                                 | Male | Female | Unknown |
| Age                            | Japan Society of Obstetrics and Gynecology [35] | X    | X      |         |
|                                | Ministry of Health, Labour and Welfare [36]     | X    | X      |         |
| Sexually transmitted diseases  | The Cochrane Library [8]                        |      |        | X       |
|                                | Japan Society of Obstetrics and Gynecology [35] |      | X      |         |
|                                | Ministry of Health, Labour and Welfare [36]     | X    | X      |         |
| Psychological stress           | Japan Society of Obstetrics and Gynecology [35] | X    |        |         |
|                                | Ministry of Health, Labour and Welfare [36]     | X    |        |         |
| Cigarette smoking              | The Cochrane Library [8]                        | X    | X      |         |
|                                | British Fertility Society [37]                  |      |        | X       |
| Alcohol use                    | The Cochrane Library [8]                        | X    | X      |         |
|                                | British Fertility Society [37]                  |      |        | X       |
| Nutrition and diet             | The Cochrane Library [8]                        | X    | X      |         |
| Physical activity and exercise | The Cochrane Library [8]                        | X    | X      |         |
| Underweight                    | The Cochrane Library [8]                        | X    | X      |         |
|                                | Japan Society of Obstetrics and Gynecology [35] |      | X      |         |
|                                | Ministry of Health, Labour and Welfare [36]     |      | X      |         |
| Overweight and obesity         | The Cochrane Library [8]                        | X    | X      |         |
|                                | Japan Society of Obstetrics and Gynecology [35] |      | X      |         |
|                                | British Fertility Society [37]                  |      |        | X       |
|                                | Ministry of Health, Labour and Welfare [36]     | X    | X      |         |
| Environmental pollutants       | The Cochrane Library [8]                        | X    | X      |         |

**Table S2.** Factors considered in the analysis.

| Category (number of codes per broad category) | Factor <sup>a</sup>                             |                |                                                                                                      | Examples of terms used in coding <sup>b</sup>                                                                               | Number of codes per factor |
|-----------------------------------------------|-------------------------------------------------|----------------|------------------------------------------------------------------------------------------------------|-----------------------------------------------------------------------------------------------------------------------------|----------------------------|
| Nutritional factors (511)                     | <b>Nutrition and diet</b>                       | Male<br>Female | Content directly related to ingredients, nutrients, and dietary habits is included.                  | Fatty foods, no breakfast, cold foods, unbalanced diet, eat at a certain time.                                              | 297                        |
|                                               | <b>Nutritional supplements</b>                  | Male<br>Female | Content directly related to nutritional supplements is included.                                     | DHA, GABA, amino acids, calcium, barley grass, glutamic acid, ginseng, coenzyme Q10, enzymes, vitamins, folic acid.         | 132                        |
|                                               | <b>Non-caffeinated beverage intake</b>          | Male<br>Female | Content directly related to non-caffeinated beverage intake, nutrients, and ingredients is included. | Green juice, almond juice, pomegranate juice, ginger tea, herbal tea, egg vinegar, soy milk, maca, amino acids, folic acid. | 63                         |
|                                               | <b>Caffeine intake</b>                          | Male<br>Female | Content directly related to caffeine intake is included.                                             | Energy drinks, coffee, tea, green tea, decaffeinated beverage, caffeine-free.                                               | 19                         |
| Alternative medicine (310)                    | <b>Consumption of the herbal medicine kampo</b> | Male<br>Female | Content directly related to consumption of the herbal medicine kampo is included.                    | Kampo (herbal medicine), autumn turmeric, unkeito, hochuekkito, keishibukuryogan, syakuyaku, juzentaihoto, dandelion tea.   | 84                         |
|                                               | <b>Acupuncture and moxibustion</b>              | Male<br>Female | Content directly related to acupuncture and moxibustion is included.                                 | Acupuncture, moxibustion.                                                                                                   | 67                         |

|                                               |                |                                                                                 |                                                                               |    |
|-----------------------------------------------|----------------|---------------------------------------------------------------------------------|-------------------------------------------------------------------------------|----|
| <b>Body work and osteopathy</b>               | Male<br>Female | Content directly related to body work and osteopathy is included.               | Body work, osteopathy.                                                        | 39 |
| <b>Aromatherapy (essential oils)</b>          | Male<br>Female | Content directly related to aromatherapy (essential oils) is included.          | Aromas, aromatic oils, essential oils.                                        | 37 |
| <b>Body deformation</b>                       | Male<br>Female | Content directly related to body deformation is included.                       | Body deformation, deformation of the body, deformation of the pelvis.         | 29 |
| <b>Massage</b>                                | Female         | Content directly related to massaging is included.                              | Massage, foot massage, reflexology, bowel massage, pressure point press.      | 13 |
| <b>Consuming herbs</b>                        | Male<br>Female | Content directly related to consuming herbs is included.                        | Herbs, echinacea, ginkgo, German chamomile, horsetail, thyme, passion flower. | 11 |
| <b>Esthetic clinic</b>                        | Female         | Content directly related to esthetic clinics is included.                       | Esthetic clinic.                                                              | 10 |
| <b>Phototherapy</b>                           | Female         | Content directly related to phototherapy is included.                           | Phototherapy.                                                                 | 5  |
| <b>Vaginal care</b>                           | Female         | Content directly related to vaginal care is included.                           | Vaginal care.                                                                 | 4  |
| <b>Highly concentrated vitamin C infusion</b> | Female         | Content directly related to highly concentrated vitamin C infusion is included. | Highly concentrated vitamin C infusion.                                       | 4  |

|                                     |                                       |                |                                                                         |                                                                                                                                                       |     |
|-------------------------------------|---------------------------------------|----------------|-------------------------------------------------------------------------|-------------------------------------------------------------------------------------------------------------------------------------------------------|-----|
|                                     | <b>Oxygen capsule use</b>             | Female         | Content directly related to oxygen capsule use is included.             | Oxygen capsules.                                                                                                                                      | 3   |
|                                     | <b>Laser therapy</b>                  | Female         | Content directly related to laser therapy is included.                  | Laser therapy.                                                                                                                                        | 3   |
|                                     | <b>Salt ball (shio bouru) massage</b> | Female         | Content directly related to salt ball (shio bouru) massage is included. | Salt ball (shio bouru) massage.                                                                                                                       | 1   |
| Psychological factors (268)         | <b>Psychological stress</b>           | Male<br>Female | Content directly related to psychological stress is included.           | Stress at work, frustration (iraira), stress from unstable income, anxiety about the future, stress in relation to the family, stress from housework. | 218 |
|                                     | <b>Fatigue</b>                        | Male<br>Female | Content directly related to fatigue is included.                        | Fatigue, tiredness, exhaustion.                                                                                                                       | 34  |
|                                     | <b>Meditation</b>                     | Female         | Content directly related to meditation is included.                     | Meditation, mindfulness, meditation art, painting nothingness into head.                                                                              | 7   |
|                                     | <b>Breathing exercises</b>            | Female         | Content directly related to breathing exercises is included.            | Method of breathing, abdominal breathing.                                                                                                             | 5   |
|                                     | <b>Psychological care/counseling</b>  | Female         | Content directly related to psychological care/counseling is included.  | Psychological care, psychological counseling, school of thought.                                                                                      | 3   |
|                                     | <b>Autogenic training</b>             | Female         | Content directly related to autogenic training is included.             | Autogenic training.                                                                                                                                   | 1   |
| Factors related to daily life (259) | <b>Sleeping habits</b>                | Male<br>Female | Content directly related to sleeping habits is included.                | Lack of sleep, poor sleep, inability to sleep, going to bed and waking up at a certain time, not getting enough sleep.                                | 81  |

|                                        |                |                                                                          |                                                                                                                                                |    |
|----------------------------------------|----------------|--------------------------------------------------------------------------|------------------------------------------------------------------------------------------------------------------------------------------------|----|
| <b>Bathing</b>                         | Male<br>Female | Content directly related to bathing is included.                         | Bathing, long baths, taking a bath, short warm baths, enzyme baths, cypress baths, hydrogen baths, steam therapy, showers, half-body baths.    | 38 |
| <b>Regular routine</b>                 | Male<br>Female | Content directly related to having a regular routine is included.        | Changing an irregular routine, trying to produce offspring with an irregular routine, living with a regular routine, living an irregular life. | 35 |
| <b>Computer use</b>                    | Male<br>Female | Content directly related to computer use is included.                    | Computer work on one's lap, distortion of body from computer use, late nights on the computer.                                                 | 17 |
| <b>Exposure to the sun and tanning</b> | Male<br>Female | Content directly related to exposure to the sun and tanning is included. | Exposure to the sun and tanning, sunscreen, ultraviolet rays.                                                                                  | 13 |
| <b>Sauna use</b>                       | Male<br>Female | Content directly related to sauna use is included.                       | Sauna, bedrock bath.                                                                                                                           | 11 |
| <b>Riding a bicycle</b>                | Male           | Content directly related to riding a bicycle is included.                | Riding a bike, saddle, bike to work.                                                                                                           | 11 |
| <b>Job</b>                             | Male<br>Female | Content directly related to one's job is included.                       | Physical work (gaten-kei), office work, desk work, night shifts, too busy with work.                                                           | 10 |
| <b>Crossing the legs</b>               | Female         | Content directly related to crossing the legs is included.               | Crossing the legs, distortion of the body from crossing the legs.                                                                              | 8  |
| <b>Smartphone use</b>                  | Male<br>Female | Content directly related to smartphone use is included.                  | Smartphone inside pants, smartphone, smartphone affects posture.                                                                               | 7  |

|                                |                                                      |                |                                                                                        |                                                                                                |     |
|--------------------------------|------------------------------------------------------|----------------|----------------------------------------------------------------------------------------|------------------------------------------------------------------------------------------------|-----|
|                                | <b>Owning a pet</b>                                  | Female         | Content directly related to owning a pet is included.                                  | Pets.                                                                                          | 5   |
|                                | <b>Holding a bag</b>                                 | Female         | Content directly related to holding a bag is included.                                 | Holding a bag, distortion of the body from holding a bag, dispersion of the weight of luggage. | 5   |
|                                | <b>Long hours of driving</b>                         | Male           | Content directly related to long hours of driving is included.                         | Long hours of driving.                                                                         | 4   |
|                                | <b>Karaoke</b>                                       | Female         | Content directly related to karaoke is included.                                       | Relieving stress by karaoke, karaoke.                                                          | 4   |
|                                | <b>Listening to music (onkatsu)</b>                  | Female         | Content directly related to listening to music (onkatsu) is included.                  | Listening to music (onkatsu), listening to classical music.                                    | 4   |
|                                | <b>Sitting on the train</b>                          | Male           | Content directly related to sitting on the train is included.                          | Sitting on the train.                                                                          | 2   |
|                                | <b>Excessive information seeking on the Internet</b> | Male<br>Female | Content directly related to seeking information on the internet is included.           | Seeking information exclusively from the Internet.                                             | 2   |
|                                | <b>Using a vacuum cleaner</b>                        | Female         | Content directly related to using a vacuum cleaner is included.                        | Using a vacuum cleaner.                                                                        | 1   |
|                                | <b>Side-sleeping or lying face down on the floor</b> | Female         | Content directly related to side-sleeping or lying face down on the floor is included. | Side-sleeping, lying face down on the floor.                                                   | 1   |
| Hypersensitivity to cold (199) | <b>Hypersensitivity to cold</b>                      | Male<br>Female | Content directly related to feeling cold or warm is included.                          | Coldness, hot activity (onkatsu), warming goods, mugwort (yomogi-mushi), warmth,               | 183 |

|                                  |                                                            |                |                                                                                              |                                                                                                                         |     |
|----------------------------------|------------------------------------------------------------|----------------|----------------------------------------------------------------------------------------------|-------------------------------------------------------------------------------------------------------------------------|-----|
|                                  |                                                            |                |                                                                                              | warmth fashion, warmth retention.                                                                                       |     |
|                                  | <b>Hypothermia</b>                                         | Female         | Content directly related to hypothermia is included.                                         | Hypothermia, low basal body temperature.                                                                                | 16  |
| Healthcare-related factors (199) | <b>Health check-up</b>                                     | Male<br>Female | Content directly related to health checkups is included.                                     | Semen testing, testing for sexually transmitted diseases, sperm testing kits, ultrasound, hormone testing, Huhner test. | 144 |
|                                  | <b>Vaccination</b>                                         | Male<br>Female | Content directly related to vaccination is included.                                         | Vaccinations for mumps, measles, rubella, flu, chickenpox, whooping cough, hepatitis B.                                 | 15  |
|                                  | <b>Medication</b>                                          | Male<br>Female | Content directly related to medication is included.                                          | Drugs, medications, hair growth products.                                                                               | 13  |
|                                  | <b>Obstetrician/gynecologist as primary-care physician</b> | Female         | Content directly related to obstetrician/gynecologist as primary-care physician is included. | Obstetrician/gynecologist as primary-care physician.                                                                    | 8   |
|                                  | <b>History of lower abdominal surgery</b>                  | Male<br>Female | Content directly related to history of lower abdominal surgery is included.                  | History of lower abdominal surgery.                                                                                     | 7   |
|                                  | <b>Psychoactive medication use</b>                         | Male<br>Female | Content directly related to psychoactive medication use is included.                         | Psychoactive medication use.                                                                                            | 7   |
|                                  | <b>Dental care</b>                                         | Female         | Content directly related to dental care is included.                                         | Dental care.                                                                                                            | 5   |

|                                           |                                                                             |                |                                                                                                              |                                                                                                                                                                   |     |
|-------------------------------------------|-----------------------------------------------------------------------------|----------------|--------------------------------------------------------------------------------------------------------------|-------------------------------------------------------------------------------------------------------------------------------------------------------------------|-----|
| Life planning and health management (186) | <b>Basal body temperature</b>                                               | Female         | Content directly related to measuring basal body temperature is included.                                    | Measuring basal body temperature.                                                                                                                                 | 81  |
|                                           | <b>Life planning (pregnancy and childbirth)</b>                             | Male<br>Female | Content directly related to life planning (pregnancy and childbirth) is included.                            | Life planning, fertility (ninkatsu) planning.                                                                                                                     | 50  |
|                                           | <b>Health management with partner</b>                                       | Male<br>Female | Content directly related to health management with partner is included.                                      | Pregnancy preparation for couples, partners, men and women.                                                                                                       | 37  |
|                                           | <b>Knowledge of medical and family history</b>                              | Male<br>Female | Content directly related to knowing medical and family history is included.                                  | Knowing the association between pre-existing conditions and pregnancy, knowing own illnesses (lifestyle and genetic diseases), knowing family members' illnesses. | 18  |
| Physical activity and exercise (181)      | <b>Physical activity and exercise (except yoga)</b>                         | Male<br>Female | Content directly related to physical activity and exercise is included. Content related to yoga is excluded. | Muscle training, hula hoops, belly dancing, running, Pilates, stretching, ballet, gym, golf, gymnastics, pressure training, intense exercise.                     | 137 |
|                                           | <b>Yoga</b>                                                                 | Male<br>Female | Content directly related to yoga is included.                                                                | Yoga, yoga meditation, yoga abdominal breathing, yoga cold relief.                                                                                                | 43  |
|                                           | <b>Qigong (Chinese mind-body exercise and mediation in order to improve</b> | Female         | Content directly related to qigong is included.                                                              | Qigong.                                                                                                                                                           | 1   |



|                                         |                                                          |                |                                                                 |                                                                                                                                                                                            |     |
|-----------------------------------------|----------------------------------------------------------|----------------|-----------------------------------------------------------------|--------------------------------------------------------------------------------------------------------------------------------------------------------------------------------------------|-----|
|                                         | <b>the equilibrium, flexibility and muscle strength)</b> |                |                                                                 |                                                                                                                                                                                            |     |
| Age (158)                               | <b>Age</b>                                               | Male<br>Female | Content directly related to age is included.                    | Egg aging, egg rejuvenation, time limits.                                                                                                                                                  | 158 |
| Overweight and underweight (102)        | <b>Underweight</b>                                       | Male<br>Female | Content directly related to underweight is included.            | Excessive dieting, carbohydrate-free diet.                                                                                                                                                 | 54  |
|                                         | <b>Overweight and obesity</b>                            | Male<br>Female | Content directly related to overweight and obesity is included. | Overweight, obesity, overeating.                                                                                                                                                           | 48  |
| Factors related to sexual behavior (78) | <b>Sexual behavior</b>                                   | Male<br>Female | Content directly related to sexual behavior is included.        | Positions (missionary, rear, cowgirl, seated), foreplay, frequency of sexual activity, resting after intercourse, resolving sexlessness, standing on one's head after intercourse.         | 58  |
|                                         | <b>Masturbation</b>                                      | Male<br>Female | Content directly related to masturbation is included.           | Abstinence, inappropriate masturbation.                                                                                                                                                    | 20  |
| Alcohol use (69)                        | <b>Alcohol use</b>                                       | Male<br>Female | Content directly related to alcohol use is included.            | Excessive drinking causes erectile dysfunction, alcohol consumption increases sex drive, alcohol consumption relieves stress, cold beer is a cause of body coldness, sweet wine (amazake). | 69  |

|                                          |                                                             |                |                                                                                                                     |                                                                                                                                      |    |
|------------------------------------------|-------------------------------------------------------------|----------------|---------------------------------------------------------------------------------------------------------------------|--------------------------------------------------------------------------------------------------------------------------------------|----|
| Cigarette smoking and substance use (66) | <b>Smoking cigarettes and exposure to second-hand smoke</b> | Male<br>Female | Content directly related to smoking cigarettes and exposure to second-hand smoke is included.                       | Smoking cigarettes, second-hand smoke, e-cigarettes.                                                                                 | 62 |
|                                          | <b>Illicit drugs (kiken dorakku)</b>                        | Male<br>Female | Content directly related to illicit drugs (kiken dorakku) use is included.                                          | Illicit drugs (kiken dorakku).                                                                                                       | 4  |
| Infectious diseases (63)                 | <b>Sexually transmitted infections</b>                      | Male<br>Female | Content directly related to sexually transmitted infections is included.                                            | Sexually transmitted infections, chlamydial infections, syphilis, gonorrhea.                                                         | 52 |
|                                          | <b>Infections (except sexually transmitted infections)</b>  | Male<br>Female | Content directly related to infections is included. Content related to sexually transmitted infections is excluded. | Rubella, influenza.                                                                                                                  | 11 |
| Factors related to clothing (59)         | <b>Underwear</b>                                            | Male<br>Female | Content directly related to underwear is included.                                                                  | Boxer shorts, trunks, men's tights, cooling underwear, constrictive underwear, body-shaping underwear, stockings, warming underwear. | 21 |
|                                          | <b>Clothing</b>                                             | Male<br>Female | Content directly related to clothing is included.                                                                   | Miniskirts, shorts, skinny pants, cooler clothes, warmer clothes, non-constrictive clothes.                                          | 15 |
|                                          | <b>Tightening the body</b>                                  | Male<br>Female | Content directly related to tight feeling in the body is included.                                                  | Tightness in the crotch, underwear, stockings.                                                                                       | 14 |
|                                          | <b>Footwear</b>                                             | Female         | Content directly related to footwear is included.                                                                   | High-heeled pumps, flats.                                                                                                            | 9  |

|                               |                                |                |                                                                  |                                                                                                                                                                                                        |    |
|-------------------------------|--------------------------------|----------------|------------------------------------------------------------------|--------------------------------------------------------------------------------------------------------------------------------------------------------------------------------------------------------|----|
| Scrotal heat (17)             | <b>Scrotal heat</b>            | Male           | Content directly related to scrotal heat is included.            | Scrotal heat, cooling testicles, testicular cooling sheets, avoiding warming the crotch using a plastic bottle to cool down after a bath.                                                              | 17 |
| Chemical-related factors (12) | <b>Environmental pollution</b> | Male<br>Female | Content directly related to environmental pollution is included. | Pesticide sprays, dioxin, photochemical smocks, trihalomethanes, acid rain, PM <sub>2.5</sub> , yellow sand, exhaust fumes, old houses with old water pipes, organic mercury, cadmium, lead, aluminum. | 9  |
|                               | <b>Household chemicals</b>     | Male<br>Female | Content directly related to household chemicals is included.     | Harmful chemicals, dishwashing detergents, shampoos and cosmetics with unknown ingredients, dental filling material with unknown ingredients, plastic products, old batteries, paint.                  | 3  |

<sup>a</sup> All content related to impact on in vitro fertilization or post-conception period is excluded.

<sup>b</sup> The authors translated terms from Japanese to English.
