# Supplementary material for: Japanese Magazine Articles on Lifestyle Factors Associated with Fertility: A Content Analysis
Source: MDPI journal article supplement (doi:10.3390/women3030031), 2023-08-24
Supplement: s1 [file s1]

Archive with 1 entries (1 files):
- women-2523063-supplementary.pdf
